1  
2  
3  
4  
5  
6  
7  
8  
9  
10  
11

**Sport Specialization , Injury and Illness: A Prospective Study of Elite Female Adolescent  
Soccer Players**

Andrew Watson, MD, MS<sup>1</sup> and Kristin Haraldsdottir, PhD<sup>1</sup>

From the <sup>1</sup>Department of Orthopedics and Rehabilitation,  
University of Wisconsin School of Medicine and Public Health, Madison, WI

## 12 **ABSTRACT**

13 Context: Although considerable cross-sectional evidence exists regarding the association  
14 between sport specialization and injury, sport-specific, prospective research is lacking.

15 Similarly, sport specialization is associated with impairments in sleep and subjective well-being  
16 in youth athletes, but it is unknown whether this increases the risk of illness.

17 Objective: To determine the relationship between sport specialization status and in-season injury  
18 and illness risk in elite female adolescent soccer players.

19 Design: Prospective Cohort Study

20 Setting: Pre-season evaluation of maximal aerobic capacity ( $VO_{2max}$ ) and sport specialization,  
21 and in-season self-reporting of daily training load (session-rating of perceived exertion), injury  
22 and illness resulting in lost sport participation time.

23 Participants: 80 female youth soccer players (ages 13-18) from a local youth soccer organization.

24 Main outcome measures: Sport specialization status, injury and illness incidence during two 4-  
25 month competitive soccer seasons. Athletes were considered specialized if they participated in  
26 soccer exclusively versus multiple sports during the year. Mixed effects logistic regression  
27 models were used to individual injury and illness (yes/no) during the study period, using sport  
28 specialization, age, and training load as fixed effects and individual athlete as a random effect.

29 Results: Specialized (n=46) athletes did not differ from non-specialized (n=34) athletes with  
30 respect to age, preseason physical activity,  $VO_{2max}$  or in-season training load (all  $p>0.05$ ). No  
31 difference was seen in the proportion of individuals from each group that reported an in-season  
32 injury (specialized = 19% v 17%,  $p=0.83$ ) or illness (40% v 38%,  $p=0.82$ ). After adjusting for  
33 age and training load, the individual injuries (OR= 0.86 [0.26, 2.8],  $p=0.81$ ) and illnesses were  
34 not significantly predicted by specialization (OR= 1.06 [0.45, 2.5],  $p=0.89$ ).

35 Conclusions: After adjusting for age and training load, sport specialization status was not  
36 associated with in-season injury or illness risk in elite female soccer players.

37

38 Keywords: training load; fatigue; stress; mood; soreness

39

40 Key points:

- 41 • Prior research regarding the associations between sport specialization and health  
42 outcomes has been primarily cross-sectional and failed to account for the confounding  
43 role of training load.
- 44 • Among elite adolescent female soccer players with similar pre-season physical activity  
45 levels in-season training loads, sport specialization was not associated with injury or  
46 illness incidence across two competitive seasons.

47

48           The association between sport specialization and overuse injury has been widely reported  
49 among youth athletes. The majority of this research has been cross-sectional, however, and  
50 typically failed to account for the potentially confounding role of training load. Specialized  
51 athletes may be subjected to higher TL than non-specialized athletes, and increases in TL have  
52 been associated with an increased risk of injury.<sup>1</sup> In a prospective study among high school  
53 athletes from multiple sports, after controlling for in-season competition volume, McGuine et al.  
54 found that high school athletes reporting moderate and high levels of sport specialization had an  
55 increased risk of in-season lower extremity injury compared to athletes with low levels of  
56 specialization. Notably, this was entirely due to the association of specialization with chronic  
57 lower extremity injuries, as no association was identified with acute lower extremity injuries.

58           Although it has been suggested that the relationship between specialization and injury is  
59 likely sport-specific, little prospective research has attempted to evaluate these relationships. In a  
60 single prospective study of youth basketball players, Post et al. found no statistically significant  
61 association between sport specialization and injury incidence in a prospective study of youth  
62 basketball athletes. Notably, Post et al. had previously identified a significant association  
63 between specialization and injury in a cross-sectional study of youth basketball athletes,  
64 suggesting that relationships from retrospective, cross-sectional research may not translate into  
65 sport-specific prospective injury risk.<sup>2</sup> It remains unclear whether the associations between  
66 specialization and injury risk differ across sports that may have different levels of specialization,  
67 different physical demands, and different types of injuries.

68           Similarly, several guidelines and policy statements have suggested that athletes who  
69 choose to specialize in a single sport at an early age may be at risk of increased stress,  
70 overtraining, and burnout.<sup>3-6</sup> A prior prospective study found that specialized female youth

71 athletes demonstrated greater impairments in fatigue, mood, stress and sleep quality during the  
72 season compared to their non-specialized counterparts, even after adjusting for training load  
73 (TL).<sup>7</sup> In adult athletes, higher volumes of exercise have been shown to be associated with an  
74 increased susceptibility to viral infections,<sup>8,9</sup> and increased weekly TL is associated with an  
75 increased illness risk.<sup>9,10</sup> A study of 15-18 year old male soccer players found that higher  
76 training duration was predictive of in-season illness,<sup>11</sup> and we have previously found that higher  
77 weekly and monthly TL was predictive of in-season illness risk among adolescent female soccer  
78 players.<sup>12</sup> Poor sleep and increased psychosocial stress have been suggested as risk factors for  
79 illness in athletes,<sup>11,13,14</sup> but it is unknown whether youth athletes who specialize in one sport are  
80 at an increased risk of in-season illness compared to youth athletes who participate in other  
81 sports during the off-season.

82 In 2019, the American Medical Society for Sports Medicine hosted a research summit on  
83 youth early sports specialization, identifying a need for prospective, sport-specific research to  
84 evaluate the association between sport specialization and outcomes that controls for the  
85 confounding effects of training load. Unfortunately, since that time, well-controlled, sport-  
86 specific, prospective research in this area has been minimal. Despite the popularity of youth  
87 soccer throughout the world, however, we are not aware of research since that time which has  
88 prospectively evaluated the relationship between sport specialization, injury and illness in youth  
89 soccer athletes. In a single cross-sectional study of male youth soccer athletes, specialization was  
90 not found to be associated with an increased risk of injury,<sup>15</sup> but no prior research has been  
91 conducted in female youth soccer athletes. Therefore, the purpose of this study was to determine  
92 the relationship between sport specialization and in-season injury and illness among female  
93 youth soccer players, while adjusting for the important influence of TL.

94

## 95 **METHODS**

### 96 **Study Design**

97 All procedures performed in this study were approved by the Institutional Review Board of the  
98 University of Wisconsin-Madison. Female athletes ages 13-18 were recruited through  
99 participation in a local youth soccer organization. Interested participants were asked to provide  
100 information regarding medications or significant cardiac or pulmonary disease that could impact  
101 cardiovascular function or performance (stimulants, congenital cardiac disease, uncontrolled  
102 hypertension, uncontrolled asthma, e.g.). Written, informed assent was provided by minor  
103 participants, and written, informed consent was provided by adult participants and parents of  
104 minor participants.

105 Prior to the start of two consecutive, 13-week fall club soccer seasons, participants  
106 completed a questionnaire regarding demographic information, sport participation history, and  
107 hours of weekly moderate-vigorous physical activity during the prior 4 weeks. As all of the  
108 athletes identified soccer as their primary sport and participated in soccer exclusively during the  
109 fall club season and for more than 8 months of the year, players were considered specialized if  
110 they participated in soccer exclusively throughout the year and had previously quit another sport  
111 to focus on soccer, and non-specialized if they also participated in other sports during the  
112 remainder of the year outside of the soccer season. This is similar to the categorization reported  
113 in a previously published study of specialization, well-being and sleep.<sup>16</sup>

114 Following completion of the questionnaire, participants were familiarized with the  
115 laboratory testing equipment. Height was measured with a stadiometer to the nearest 0.25 cm and  
116 body mass with a calibrated balance beam scale to the nearest 0.1 kg. Each participant then

117 performed a progressive, maximal exercise test on an electronically braked cycle ergometer  
118 (Racermate, Seattle, WA). Subjects were familiarized with the exercise testing equipment, after  
119 which they were asked to pedal in an upright position at a cadence of 70 rpm with an initial load  
120 of 85W and incremental loads of 35W applied at 3-min intervals to the point of exhaustion,  
121 defined as the point when the pedal cadence can no longer be maintained despite strong verbal  
122 encouragement. During the test, total ventilation, oxygen consumption ( $\text{VO}_2$ ), and carbon  
123 dioxide ( $\text{VCO}_2$ ) were measured, and respiratory exchange ratio (RER;  $\text{VCO}_2/\text{VO}_2$ ) was  
124 calculated, in a continuous, breath-by-breath manner by a metabolic cart (Cosmed, Chicago, IL).  
125 To account for variations in breath-by-breath measurement, these values were expressed as a 30-  
126 second rolling average.  $\text{VO}_{2\text{max}}$  was defined as the highest value obtained during the test, and  
127 recorded along with time to exhaustion ( $T_{\text{max}}$ ).  $\text{VO}_{2\text{max}}$  was expressed relative to body mass  
128 (ml/kg/min). A test was considered maximal if the athlete satisfied at least 2 of the following 3  
129 objective criteria: (1) maximal heart rate >90% of the predicted maximal heart rate; (2) RER  
130 >1.1; (3) a plateau in oxygen consumption, defined as a change of <2 ml/kg/min in  $\text{O}_2$   
131 consumption over the last 60 seconds of the test. All of the fitness testing was conducted by a  
132 primary care sports medicine physician and an exercise physiologist with several years of prior  
133 testing experience.

134 Immediately following all physical activity, participants provided the duration (minutes)  
135 and perceived intensity (1 to 10) of the session using an online software program (fitfor90.com),  
136 which were multiplied to yield a unitless session-rating of perceived exertion (sRPE) value as a  
137 measure of internal TL.<sup>10,17</sup> Throughout each season, participants were asked to report any  
138 injuries that resulted in restriction from participation in soccer events, including the date of onset,  
139 injury location, injury type, injury mechanism (acute, chronic) and diagnosis. Similarly, athletes

140 were asked to report any illnesses that resulted in restriction from participation, including the  
141 date of onset, predominant symptoms, and diagnosis, using the same online software program.  
142 Follow-up interviews were conducted by the study team in any instances in which the details of  
143 the injury or illness were unclear. Compliance with the completion of daily TL, injury and  
144 illness reporting was encouraged periodically throughout the study period by coaching staff. This  
145 approach has been reported previously in prior studies of the predictors of in-season injury and  
146 illness among youth soccer athletes.<sup>18,19</sup>

147

### 148 *Statistical Analysis*

149 Data were initially evaluated for normality using descriptive statistics and histogram  
150 analysis. Age group was determined based on birth year in accordance with the current  
151 classification by U.S. Soccer. Age, BMI, preseason physical activity, years of soccer experience,  
152 and fitness ( $VO_{2max}$ ,  $T_{max}$ ) were compared between specialization groups with Wilcoxon Rank  
153 Sum Tests and across age groups (U14, U15, U16, U17, U18) using Kruskal-Wallis tests with  
154 post-hoc pairwise Wilcoxon Rank Sum Tests adjusted for multiple comparisons. The proportion  
155 of individuals who suffered an in-season injury or illness were compared across age groups  
156 (U14, U15, U16, U17, U18) using a chi-square test. Separate mixed effects logistic regression  
157 models were used to predict 1) in-season injury (yes, no) and 2) in-season illness (yes, no) for  
158 each individual using sport specialization, age, and TL as fixed effects. Individual was included  
159 as a random effect since some participants participated in multiple seasons. Finally, separate  
160 survival analyses were conducted to compare 1) time to injury and 2) time to illness between the  
161 specialized and non-specialized athletes, with comparisons using the Likelihood Ratio Test from  
162 similarly adjusted Cox proportional hazards models. In the comparisons between specialization



163 groups and in the mixed effects model, age at the start of the season was included as a  
164 continuous variable, rather than age group. The participants in this study represent a  
165 convenience sample of athletes from a single soccer club who were interested in participation  
166 during two consecutive years and does not represent a sample size based on an *a priori* power  
167 analysis. Significance level was determined *a priori* at the 0.05 level and all tests were 2-tailed.  
168 All statistical analyses were performed in R.<sup>20</sup>

169

## 170 **RESULTS**

171 Eighty female youth soccer athletes ( $15.2 \pm 1.5$  years) participated in the study, with 46  
172 specialized and 34 non-specialized athletes. 56 athletes (37 specialized) participated in the first  
173 year, while 52 (31 specialized) participated in the second year, 28 of whom participated in both  
174 years (22 specialized), resulting in 108 person-years over the two seasons. There were no  
175 differences between groups with respect to age, years of experience, pre-season physical activity,  
176 or fitness level (Table 1). The proportion of athletes categorized as specialized differed  
177 significantly across age groups, with older age groups demonstrating higher rates of  
178 specialization (Figure 1). Total in-season TL during the two seasons did not differ between  
179 specialized and non-specialized athletes ( $417 \pm 101$  v  $393 \pm 100$  arbitrary units,  $p=0.31$ ).

180 Twenty-eight time-loss injuries were reported, of which 3 (11%) were chronic and knee,  
181 ankle and upper leg were the most common injury locations (Table 2). The proportion of athletes  
182 that suffered an in-season injury during the study period did not differ between specialized and  
183 non-specialized groups (19% v 17%,  $p=0.83$ ). In the mixed effects logistic regression model,  
184 in-season injury was not independently predicted by specialization (odds ratio (OR) = 0.86 [95%  
185 CI = 0.26 – 2.8],  $p=0.81$ ), training load (OR = 0.61 [0.30 – 1.23],  $p=0.18$ ), or age (OR = 1.1

186 [0.71–1.7],  $p=0.68$ ). In the survival analysis, no significant differences were identified between  
187 specialized and non-specialized athletes with respect to time to injury ( $p=0.16$ ; Figure 2).

188 Fifty-nine illnesses were reported, with the most common being upper respiratory  
189 illnesses, followed by gastrointestinal illnesses (Table 3). The proportion of athletes that  
190 suffered an in-season illness during the study period did not differ between specialized and non-  
191 specialized groups (40% v 38%,  $p=0.82$ ). In the mixed effects logistic regression model, in-  
192 season illness was not independently predicted by specialization (OR= 1.06 [0.45 – 2.5],  
193  $p=0.89$ ), training load (OR= 1.4 [0.92 – 2.1],  $p=0.12$ ), or age (OR= 1.13 [0.83 – 1.5],  $p=0.44$ ).  
194 Similarly, no significant difference was found in the survival analysis between specialized and  
195 non-specialized athletes with respect to time to illness ( $p= 0.81$ ; Figure 3).

196

## 197 **DISCUSSION**

198 The primary finding of this study was that we found no evidence of an increased risk of  
199 in-season injury among specialized youth soccer athletes over the course of two consecutive  
200 seasons. Similarly, we found no difference in the time to injury between athletes who  
201 exclusively participate in soccer and those who participate in multiple sports. This is contrast to  
202 the cross-sectional evidence regarding the relationships between specialization and injury, as  
203 well as a large, prospective study of specialization and injury among high school athletes from  
204 various sports.<sup>21-23</sup> It is, however, similar to the findings of a prior cross-sectional study of elite  
205 youth male soccer athletes, as well as a recent, prospective study of youth basketball athletes,  
206 both of which failed to identify an association between specialization and injury.<sup>2,15</sup> This may  
207 suggest that the relationships between injury risk and sport specialization differ between sports,  
208 and reinforces the need for sport-specific evidence to help guide individualized decision-making

209 for children and families regarding sport participation.

210 In addition, we found no increased incidence of illness among specialized athletes  
211 compared to their non-specialized teammates. Interestingly, sport specialization among female  
212 adolescent athletes has been found to be associated with impairments in sleep quality, mood, and  
213 fatigue,<sup>7</sup> all of which can lead to increased illness risk.<sup>24-26</sup> Given that higher incidence of illness  
214 among adolescent male soccer players has been found to be associated with increases in  
215 psychosocial stress,<sup>11</sup> we sought to determine whether participating in other sports outside of the  
216 main competitive soccer season could have an influence on illness risk in elite female adolescent  
217 soccer players. Our results are similar to those recently reported in younger athletes, ages 10-14,  
218 that similarly found that sport specialization was not associated with increased illness risk.<sup>27</sup> In  
219 fact, that study found that decreased sleep and lower physical activity were the primary  
220 predictors of in-season illness. Given the rich data in support of the positive long-term benefits of  
221 physical activity among youth and adolescents,<sup>28</sup> our findings suggest that sport participation  
222 does not increase risk of illness in adolescent elite female soccer players, regardless of sport  
223 specialization status.

224 There are several variables which can potentially influence the relationships between  
225 sport specialization and health outcomes of athletes. TL is associated with injury risk, and it has  
226 been suggested that increased TL may be a predictor of in-season illness in athletes.<sup>12,29</sup> Higher  
227 TL is often considered a potentially important confounder in comparisons of specialized and  
228 non-specialized athletes, as it is assumed that specialized athletes may have a higher TL which  
229 may be the true driver of adverse outcomes such as injury or illness. In fact, a recent review  
230 found that of the five included studies that attempted to evaluate the association between  
231 specialization and injury independent of training load, two studies found that the association was

232 no longer significant, while three found that the relationship persisted. In order to account for  
233 this, we specifically recruited a group of athletes from within a single organization that would  
234 have comparable in-season TL, identified the specialized and non-specialized players, and  
235 adjusted for TL within our statistical models. As expected, we did find very similar in-season  
236 TL between the groups, but even after accounting for any differences we did not find any  
237 association between specialization and either injuries or illnesses during the season.

238 A rapid change in physical activity or training load may also impact risk of both injury  
239 and illness,<sup>25</sup> where specialized athletes could potentially be at greater risk if their pre-season  
240 physical activity levels were significantly lower than the athletes participating in other sports.  
241 Similarly, we have previously found that lower levels of preseason fitness are associated with an  
242 increased risk of subsequent in-season injury and illness in youth soccer athletes.<sup>19</sup> In the present  
243 study, however, we found no significant difference in  $VO_{2max}$  or pre-season vigorous physical  
244 activity between the specialized and non-specialized groups, suggesting that specialization status  
245 did not influence aerobic fitness or activity level in the soccer off-season.

246 This study has several limitations. Without randomization of individuals to specialization  
247 groups, it is not possible to determine whether between-group differences can be attributed to  
248 specialization itself, or some other coincident attributes of the groups that could be associated  
249 with specialization. Compliance with data collection of TL was ~80% and as a result there was  
250 data missing. We did not identify any obvious relationship between compliance and date,  
251 specific individuals, or specialization group, and consequently chose to analyze the raw data  
252 without imputation, similar to prior work using a similar data collection mechanism.<sup>7,16,18,19</sup> This  
253 study also used a commercially available software program rather than a previously utilized  
254 questionnaire regarding injury and illness reporting. Nonetheless, this approach has been used

255 previously to identify relationships between TL, subjective well-being, injury and illness,<sup>12</sup> and  
256 was felt to represent a more cost-effective and feasible method to collect large amounts of daily,  
257 individual data over a significant period of time than traditional questionnaires. A proportion of  
258 the participants participated in both years of the study, of whom a greater number were from the  
259 specialized group. While it is possible that this could skew the results, we have attempted to  
260 account for this by utilizing a mixed effects regression model to evaluate the relationships  
261 between specialization, injury and illness and included each individual as a random effect. As  
262 above, the sample size in the study was based on a convenience sample rather than an *a priori*  
263 power analysis, which could result in a failure to identify significant differences in group  
264 comparisons. Lastly, this study included only adolescent female soccer players from a single  
265 club and a single sport and may not be generalizable to other populations.

266 In conclusion, we did not find any association between sport specialization and in-season  
267 injury or in-season illness incidence among adolescent female soccer players. Similarly, we  
268 found no difference in the time to injury or illness between specialized and non-specialized  
269 athletes. This suggests that the relationships between sport specialization and health outcomes  
270 may be sport-specific, and further prospective research is warranted to determine whether this  
271 relationship exists in other populations of youth athletes.

272

### 273 **CONFLICTS OF INTEREST**

274 The authors have no conflicts of interest to disclose. This study was funded by the Young  
275 Investigator Award from the American Medical Society for Sports Medicine.

276 **REFERENCES**

- 277 1. Hausswirth C, Louis J, Aubry A, Bonnet G, Duffield R, Y LEM. Evidence of disturbed  
278 sleep and increased illness in overreached endurance athletes. Research Support, Non-U.S.  
279 Gov't. *Med Sci Sports Exerc.* 2014;46(5):1036-45. doi:10.1249/MSS.000000000000177
- 280 2. Post EG, Rivera MJ, Robison HJ, Rauh MJ, McGuine TA, Simon JE. Injury risk factors  
281 related to sport specialization in high school basketball: a prospective study. *J Athl Train.*  
282 May 22 2024;doi:10.4085/1062-6050-0066.241
- 283 3. Bell DR, Post EG, Trigsted SM, Hetzel S, McGuine TA, Brooks MA. Prevalence of Sport  
284 Specialization in High School Athletics: A 1-Year Observational Study. *Am J Sports Med.* Jun  
285 2016;44(6):1469-74. doi:10.1177/0363546516629943
- 286 4. Brenner JS. Overuse injuries, overtraining, and burnout in child and adolescent  
287 athletes. Review. *Pediatrics.* 2007;119(6):1242-5.
- 288 5. Myer GD, Jayanthi N, Difiori JP, et al. Sport Specialization, Part I: Does Early Sports  
289 Specialization Increase Negative Outcomes and Reduce the Opportunity for Success in  
290 Young Athletes? Review. *Sports Health.* Sep-Oct 2015;7(5):437-42.  
291 doi:10.1177/1941738115598747
- 292 6. LaPrade RF, Agel J, Baker J, et al. AOSSM Early Sport Specialization Consensus  
293 Statement. *Orthopaedic journal of sports medicine.* Apr 2016;4(4):2325967116644241.  
294 doi:10.1177/2325967116644241
- 295 7. Watson A, Brickson S. Impaired Sleep Mediates the Negative Effects of Training Load  
296 on Subjective Well-Being in Female Youth Athletes. *Sports Health.* May/June  
297 2018;10(3):244-249. doi:10.1177/1941738118757422

- 298 8. Svendsen IS, Gleeson M, Haugen TA, Tonnessen E. Effect of an intense period of  
299 competition on race performance and self-reported illness in elite cross-country skiers.  
300 *Scand J Med Sci Sports*. Mar 27 2015;doi:10.1111/sms.12452
- 301 9. Thornton HR, Delaney JA, Duthie GM, et al. Predicting Self-Reported Illness for  
302 Professional Team-Sport Athletes. *Int J Sports Physiol Perform*. Sep 21  
303 2015;doi:10.1123/ijsp.2015-0330
- 304 10. Foster C. Monitoring training in athletes with reference to overtraining syndrome.  
305 *Med Sci Sports Exerc*. Jul 1998;30(7):1164-8.
- 306 11. Brink MS, Visscher C, Arends S, Zwerver J, Post WJ, Lemmink KA. Monitoring stress  
307 and recovery: new insights for the prevention of injuries and illnesses in elite youth soccer  
308 players. Research Support, Non-U.S. Gov't. *Br J Sports Med*. Sep 2010;44(11):809-15.  
309 doi:10.1136/bjism.2009.069476
- 310 12. Watson A, Brickson S, Brooks A, Dunn W. Subjective well-being and training load  
311 predict in-season injury and illness risk in female youth soccer players. *Br J Sports Med*. Feb  
312 2017;51(3):194-199. doi:10.1136/bjsports-2016-096584
- 313 13. Mann JB, Bryant KR, Johnstone B, Ivey PA, Sayers SP. Effect of Physical and Academic  
314 Stress on Illness and Injury in Division 1 College Football Players. *J Strength Cond Res*. Jan  
315 2016;30(1):20-5. doi:10.1519/JSC.0000000000001055
- 316 14. Drew MK, Vlahovich N, Hughes D, et al. A multifactorial evaluation of illness risk  
317 factors in athletes preparing for the Summer Olympic Games. *J Sci Med Sport*. Mar 21  
318 2017;doi:10.1016/j.jsams.2017.02.010

- 319 15. Frome D, Rychlik K, Fokas J, Chiampas G, Jayanthi N, LaBella C. Sports Specialization  
320 Is Not Associated With Greater Odds of Previous Injury in Elite Male Youth Soccer Players.  
321 *Clin J Sport Med*. Sep 2019;29(5):368-373. doi:10.1097/jsm.0000000000000643
- 322 16. Watson A, Brickson S. Relationships Between Sport Specialization, Sleep, and  
323 Subjective Well-Being in Female Adolescent Athletes. *Clin J Sport Med*. Sep 2019;29(5):384-  
324 390. doi:10.1097/jsm.0000000000000631
- 325 17. Foster C, Florhaug JA, Franklin J, et al. A new approach to monitoring exercise  
326 training. Comparative Study  
327 Evaluation Studies. *J Strength Cond Res*. Feb 2001;15(1):109-15.
- 328 18. Watson A, Brickson S, Brooks A, Dunn W. Subjective well-being and training load  
329 predict in-season injury and illness risk in female youth soccer players. *British Journal of*  
330 *Sports Medicine*. 2017;51(3):194. doi:10.1136/bjsports-2016-096584
- 331 19. Watson A, Brickson S, Brooks MA, Dunn W. Preseason Aerobic Fitness Predicts In-  
332 Season Injury and Illness in Female Youth Athletes. *Orthopaedic Journal of Sports Medicine*.  
333 2017/09/01 2017;5(9):2325967117726976. doi:10.1177/2325967117726976
- 334 20. *R: A language and environment for statistical computing*  
335 . R Foundation for Statistical Computing; 2015. <https://www.R-project.org/>
- 336 21. Post EG, Biese KM, Schaefer DA, et al. Sport-Specific Associations of Specialization  
337 and Sex With Overuse Injury in Youth Athletes. *Sports Health*. Jan/Feb 2020;12(1):36-42.  
338 doi:10.1177/1941738119886855
- 339 22. Post EG, Trigsted SM, Riekens JW, et al. The association of sport specialization and  
340 training volume with injury history in youth athletes. *The American journal of sports*  
341 *medicine*. 2017;45(6):1405-1412.



- 342 23. McGuine TA, Post EG, Hetzel SJ, Brooks MA, Trigsted S, Bell DR. A Prospective Study  
343 on the Effect of Sport Specialization on Lower Extremity Injury Rates in High School  
344 Athletes. *Am J Sports Med*. Oct 2017;45(12):2706-2712. doi:10.1177/0363546517710213
- 345 24. Jones CM, Griffiths PC, Mellalieu SD. Training Load and Fatigue Marker Associations  
346 with Injury and Illness: A Systematic Review of Longitudinal Studies. *Sports Med*. May  
347 2017;47(5):943-974. doi:10.1007/s40279-016-0619-5
- 348 25. Drew MK, Finch CF. The Relationship Between Training Load and Injury, Illness and  
349 Soreness: A Systematic and Literature Review. *Sports Med*. Jun 2016;46(6):861-83.  
350 doi:10.1007/s40279-015-0459-8
- 351 26. Watson A, Brindle J, Brickson S, Allee T, Sanfilippo J. Preseason Aerobic Capacity Is  
352 an Independent Predictor of In-Season Injury in Collegiate Soccer Players. *Clin J Sport Med*.  
353 May 2017;27(3):302-307. doi:10.1097/JSM.0000000000000331
- 354 27. Watson A, Post E, Biese K, Kliethermes S, Brooks MA, Bell D. Decreased Physical  
355 Activity and Sleep, Not Sport Specialization, Predict Illness in Middle School Athletes. *Sports*  
356 *Health*. Jan/Feb 2021;13(1):25-30. doi:10.1177/1941738120927599
- 357 28. Kohl HW, Hobbs KE. Development of Physical Activity Behaviors Among Children  
358 and Adolescents. *Pediatrics*. 1998;101(Supplement 2):549-554.
- 359 29. Schwellnus M, Soligard T, Alonso JM, et al. How much is too much? (Part 2)  
360 International Olympic Committee consensus statement on load in sport and risk of illness.  
361 Consensus Development Conference. *Br J Sports Med*. Sep 2016;50(17):1043-52.  
362 doi:10.1136/bjsports-2016-096572
- 363

364 Table 1. Comparison of pre-season age, soccer experience, physical activity, fitness and prior  
365 injury between specialized and non-specialized female soccer athletes.

| Variable                       | Specialized (n=46) | Not specialized (n=34) | <i>p</i> |
|--------------------------------|--------------------|------------------------|----------|
| Age (years)                    | 15.21 ± 1.5        | 14.7 ± 1.7             | 0.28     |
| Soccer experience (years)      | 9.4 ± 2.0          | 9.4 ± 3.4              | 0.74     |
| Pre-season PA (hours/week)     | 3.3 ± 1.3          | 3.7 ± 1.2              | 0.37     |
| VO <sub>2max</sub> (ml/kg/min) | 47.2 ± 6.5         | 46.5 ± 6.1             | 0.56     |
| Time to exhaustion (min)       | 14.3 ± 2.2         | 14.8 ± 2.9             | 0.48     |

366 Data shown as mean ± SD. BMI = body mass index; PA = hours of vigorous physical activity;

367 VO<sub>2max</sub> = maximal aerobic capacity.

368 Table 2. Injury locations reported over two consecutive seasons among elite female adolescent  
369 soccer players.

| Injury    | Number |
|-----------|--------|
| Location  | (%)    |
| Knee      | 8 (29) |
| Ankle     | 5 (18) |
| Upper leg | 5 (18) |
| Head      | 4 (14) |
| Foot      | 3 (11) |
| Groin     | 1 (4)  |
| Back      | 1 (4)  |
| Lower leg | 1 (4)  |

370

371 Table 3. Types of illnesses reported over two consecutive seasons among elite female adolescent  
372 soccer players.

373

| Illness Type              | Number (%) |
|---------------------------|------------|
| Upper respiratory illness | 44 (73)    |
| Gastrointestinal illness  | 8 (13)     |
| Lower respiratory illness | 4 (7)      |
| Fever                     | 3 (5)      |

374

375

376 Figure Legends

377 Figure 1. The proportion of adolescent female soccer players in each age group who were  
378 classified as specialized.

379 Figure 2. Kaplan-Meier curve showing the proportion of specialized and non-specialized female  
380 adolescent soccer athletes that remained free of injury over the course of two 4-month seasons.

381 Figure 3. Kaplan-Meier curve showing the proportion of specialized and non-specialized female  
382 adolescent soccer athletes that remained free of illness over the course of two 4-month seasons.

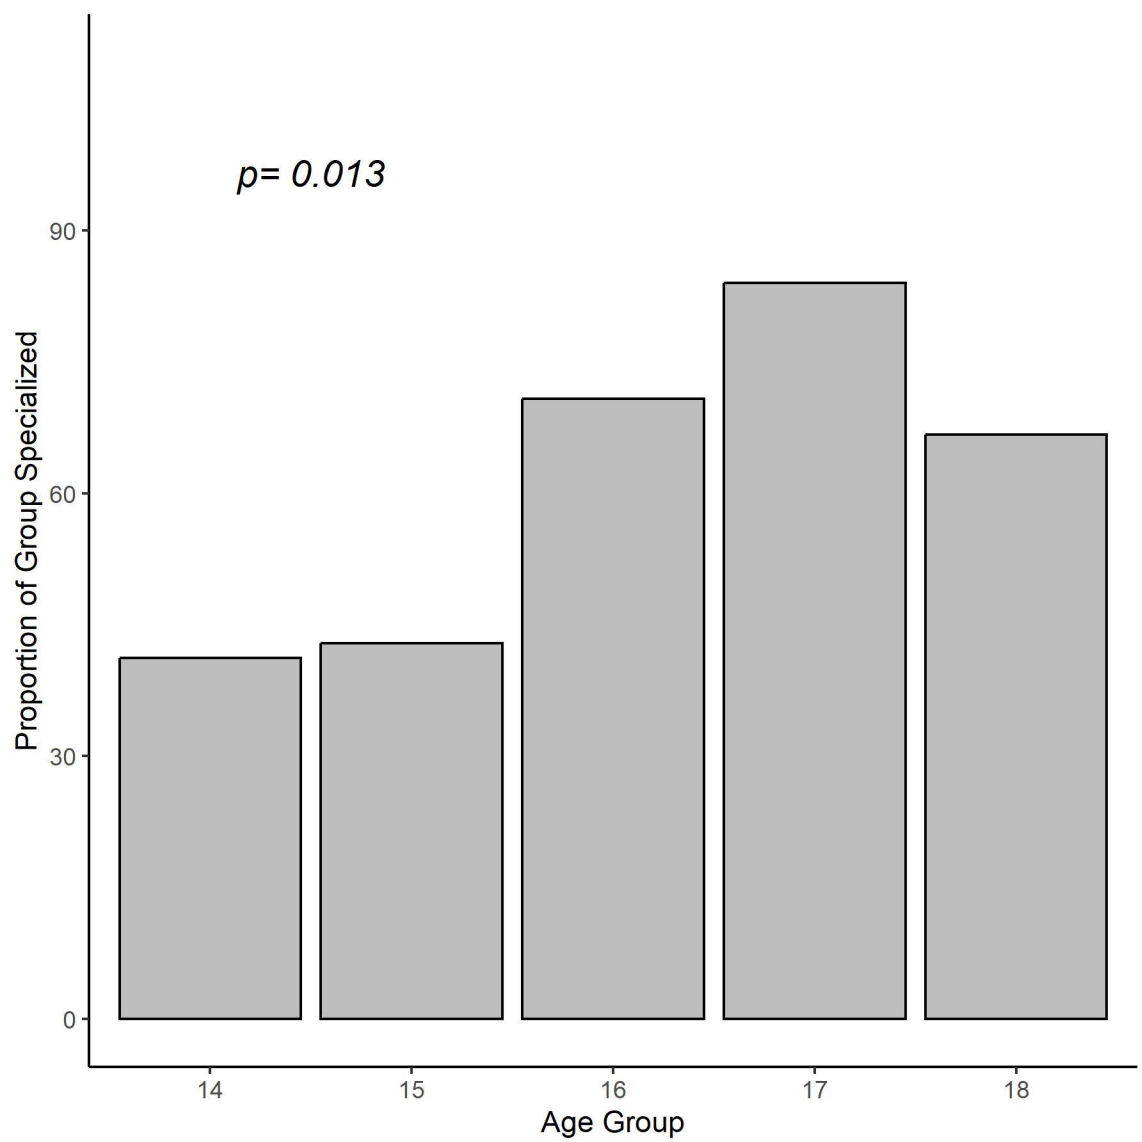

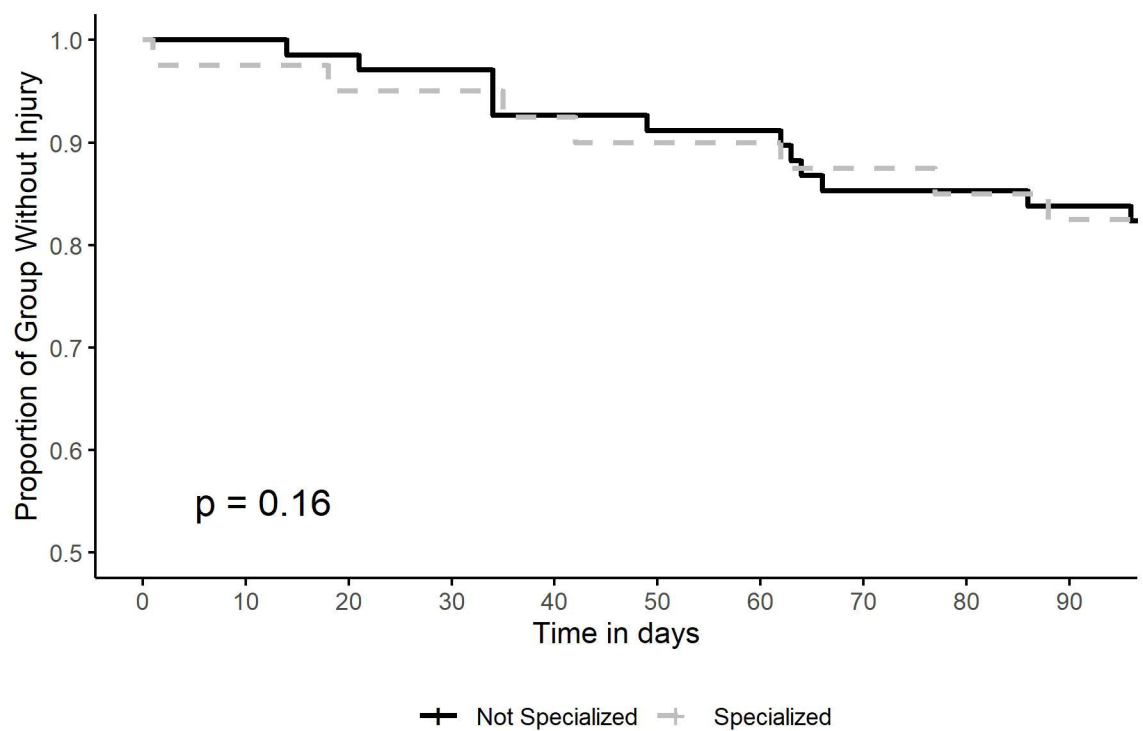

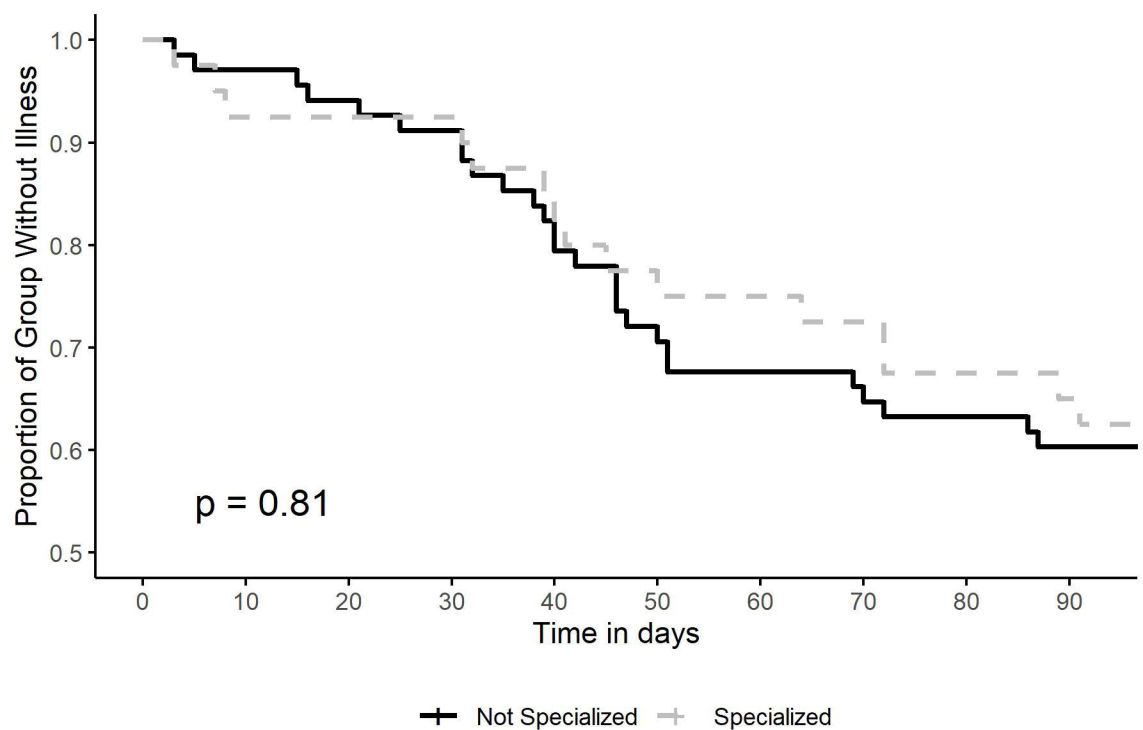

Source: https://medrxiv.org/content/10.1101/2024.09.23.24314149v1.full.pdf
